# Supplementary material
Source: publisher figshare collection journal article supplement (https://tandf.figshare.com/ndownloader/files/13729643)
Supplement: Supplementary file 1 [file 13729643]

Table s1 Kinetic parameters of reaction-based of HA-coated-stone

Table s2 Freundlich and langmuir isotherm parameters of fluoride sorption on HA-coated-stone

Table.s3 Thermodynamic parameters of fluoride sorption on HA-coated-stone

Table s1

| Methods | Parameters | 30℃ | | | | 35℃ | | | | 40℃ | | | |
| --- | --- | --- | --- | --- | --- | --- | --- | --- | --- | --- | --- | --- | --- |
| 10  mg/L | 20  mg/L | 30 mg/L | 40  mg/L | 10 mg/L | 20  mg/L | 30 mg/L | 40  mg/L | 10  mg/L | 20  mg/L | 30  mg/L | 40  mg/L |
| Pseudo-  first-order | K  (min-1) | 0.144 | 0.156 | 0.0709 | 0.122 | 0.099 | 0.041 | 0.168 | -0.0041 | 0.0586 | 0.0438 | 0.0507 | 0.0484 |
| R2 | 0.919 | 0.947 | 0.918 | 0.907 | 0.9963 | 0.778 | 0.808 | 0.176 | 0.959 | 0.958 | 0.991 | 0.998 |
| qe  (mg/g) | 5.72 | 6.94 | 6.05 | 7.81 | 7.34 | 9.79 | 10.4 | 12.6 | 7.93 | 8.62 | 11.5 | 12.0 |
| Pseudo-  second-order | K  (g/mg•min) | 0.0394 | 0.0251 | 0.0263 | 0.0137 | 0.0134 | 0.00536 | 0.00586 | 0.00815 | 0.00852 | 0.011 | 0.0114 | 0.0148 |
| h  (mg/g•min) | 0.885 | 1.23 | 1.16 | 1.10 | 0.834 | 0.747 | 0.973 | 1.590 | 0.701 | 1.06 | 1.74 | 2.51 |
| R2 | 0.989 | 0.987 | 0.999 | 0.9937 | 0.9942 | 0.962 | 0.963 | 0.962 | 0.997 | 0.998 | 0.9993 | 0.9992 |

Table s2

| Temperature  (℃) | Freundlich isotherm parameters | | | | langmuir isotherm parameters | | |
| --- | --- | --- | --- | --- | --- | --- | --- |
| 1/n | n | KF | R2 | (mg/g) | b (L/g) | R2 |
| 30 | 0.212 | 4.72 | 4.06 | 0.5435 | 11.1 | 0.0792 | 0.76 |
| 35 | 0.263 | 3.81 | 50.3 | 0.9554 | 15.2 | 0.126 | 0.92 |
| 40 | 0.308 | 3.24 | 4.51 | 0.8603 | 17.7 | 0.0623 | 0.93 |

Table s3

| T(℃) | lnK | ( kJ/mol) | J/(mol•K) | ( kJ/mol) |
| --- | --- | --- | --- | --- |
| 30 | -0.291 | -0.73 | 87.0 | 0.29 |
| 35 | -1.01 | -2.60 |
| 40 | -1.39 | -3.62 |
